# Supplementary material for: Calibration model transfer in mid-infrared process analysis within situattenuated total reflectance immersion probes
Source: Royal Society of Chemistry journal article supplement (doi:10.1039/d2ay00116k), 2022-01-01
Supplement: d2ay00116k1.pdf [file d2ay00116k1.pdf]

## Calibration model transfer in mid-infrared process analysis with in situ attenuated total reflectance immersion probes - Supplementary Information

Andrew J. Parrott<sup>1</sup>, Allyson C. McIntyre<sup>1</sup>, Megan Holden<sup>1</sup>, Gary

Colquhoun<sup>2</sup>, Zeng-Ping Chen<sup>3</sup>, David Littlejohn<sup>1</sup> and Alison Nordon<sup>1\*</sup>

<sup>1</sup>WestCHEM, Department of Pure and Applied Chemistry and CPACT, University of Strathclyde, 295 Cathedral Street, Glasgow, G1 1XL, UK.

<sup>2</sup>Fibre Photonics Australia Pty Ltd, Forestville, Sydney, 2087, NSW, Australia.

<sup>3</sup>State Key Laboratory of Chemo/Biosensing and Chemometrics, College of Chemistry and Chemical Engineering, Hunan University, Changsha, 410082, Hunan, China.

\*Corresponding author, e-mail: [alison.nordon@strath.ac.uk](mailto:alison.nordon@strath.ac.uk);

All the data underpinning this publication are openly available from the University of Strathclyde KnowledgeBase at <https://doi.org/10.15129/42fb0eac-a54a-4b63-85f5-4ed6c965144f>.

Table S1. Concentrations (% w/w) of acetone, ethanol and ethyl acetate in the calibration (samples 1 to 10) and test (samples 11 to 16) sets.

| Sample number | Concentration / (% w/w) |         |               |
|---------------|-------------------------|---------|---------------|
|               | Acetone                 | Ethanol | Ethyl acetate |
| 1             | 0.0                     | 100.0   | 0.0           |
| 2             | 100.0                   | 0.0     | 0.0           |
| 3             | 0.0                     | 0.0     | 100.0         |
| 4             | 50.0                    | 50.0    | 0.0           |
| 5             | 50.0                    | 0.0     | 50.0          |
| 6             | 0.0                     | 49.9    | 50.1          |
| 7             | 33.3                    | 33.4    | 33.3          |
| 8             | 65.6                    | 17.4    | 17.0          |
| 9             | 17.0                    | 66.0    | 17.0          |
| 10            | 17.0                    | 17.0    | 66.0          |
| 11            | 6.0                     | 85.0    | 9.0           |
| 12            | 26.0                    | 61.0    | 13.0          |
| 13            | 42.0                    | 33.0    | 25.0          |
| 14            | 83.0                    | 10.0    | 7.0           |
| 15            | 47.0                    | 7.0     | 46.0          |
| 16            | 11.0                    | 18.0    | 71.0          |

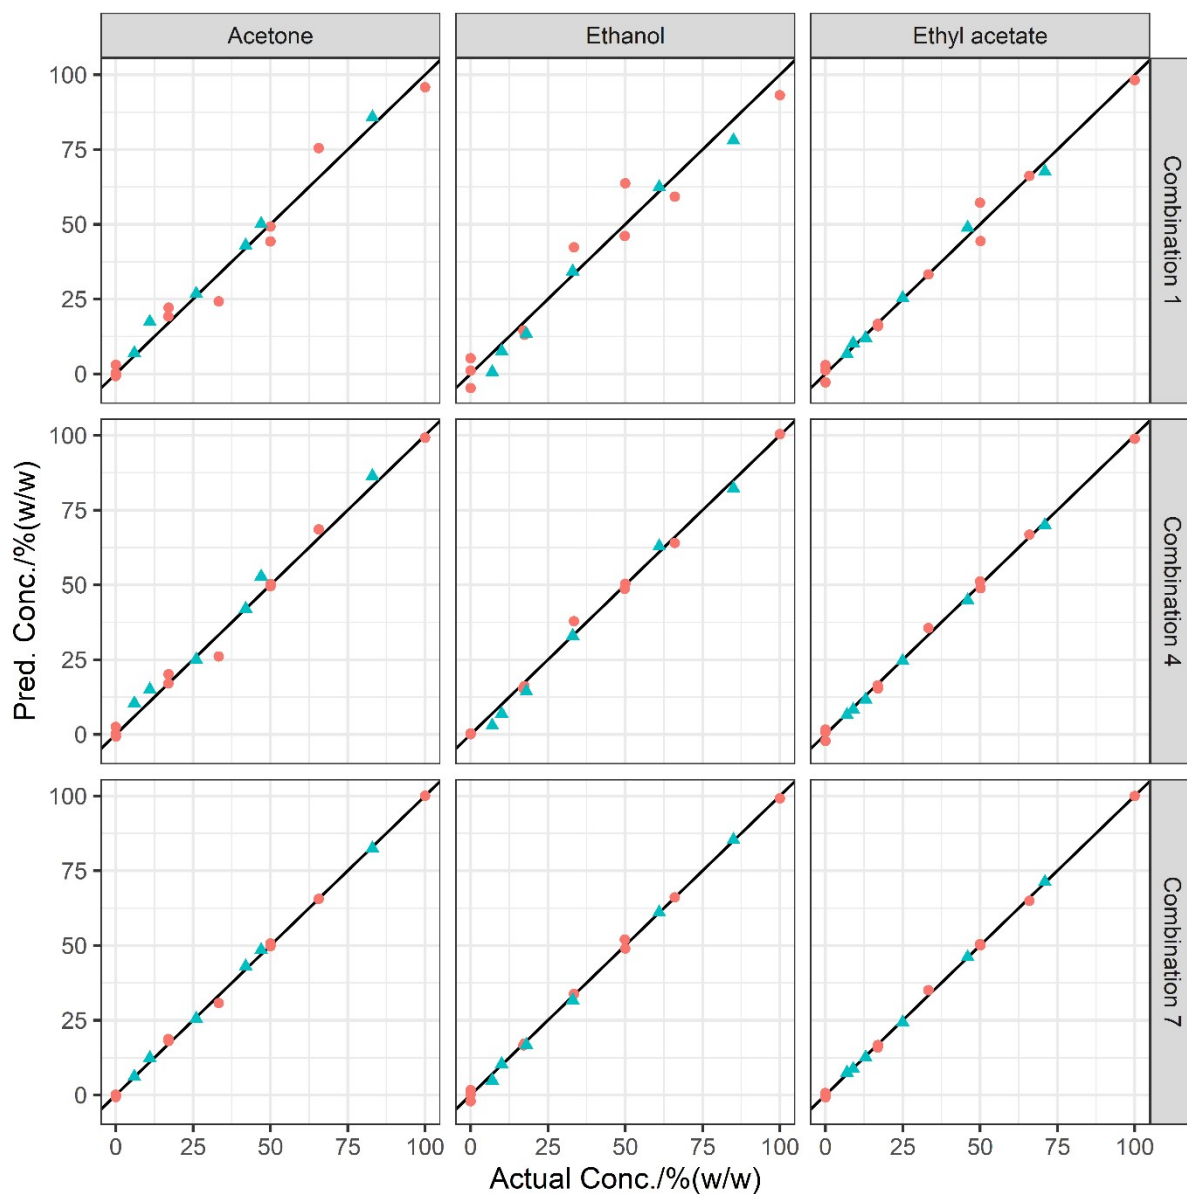

Fig. S1 Plots of actual v predicted concentration for acetone, ethanol and ethyl acetate when samples were analysed using spectrometer-probe combinations 1, 4 and 7. Red circles denotes the calibration samples, teal triangles denotes the test samples, and the solid line denotes  $y = x$ .

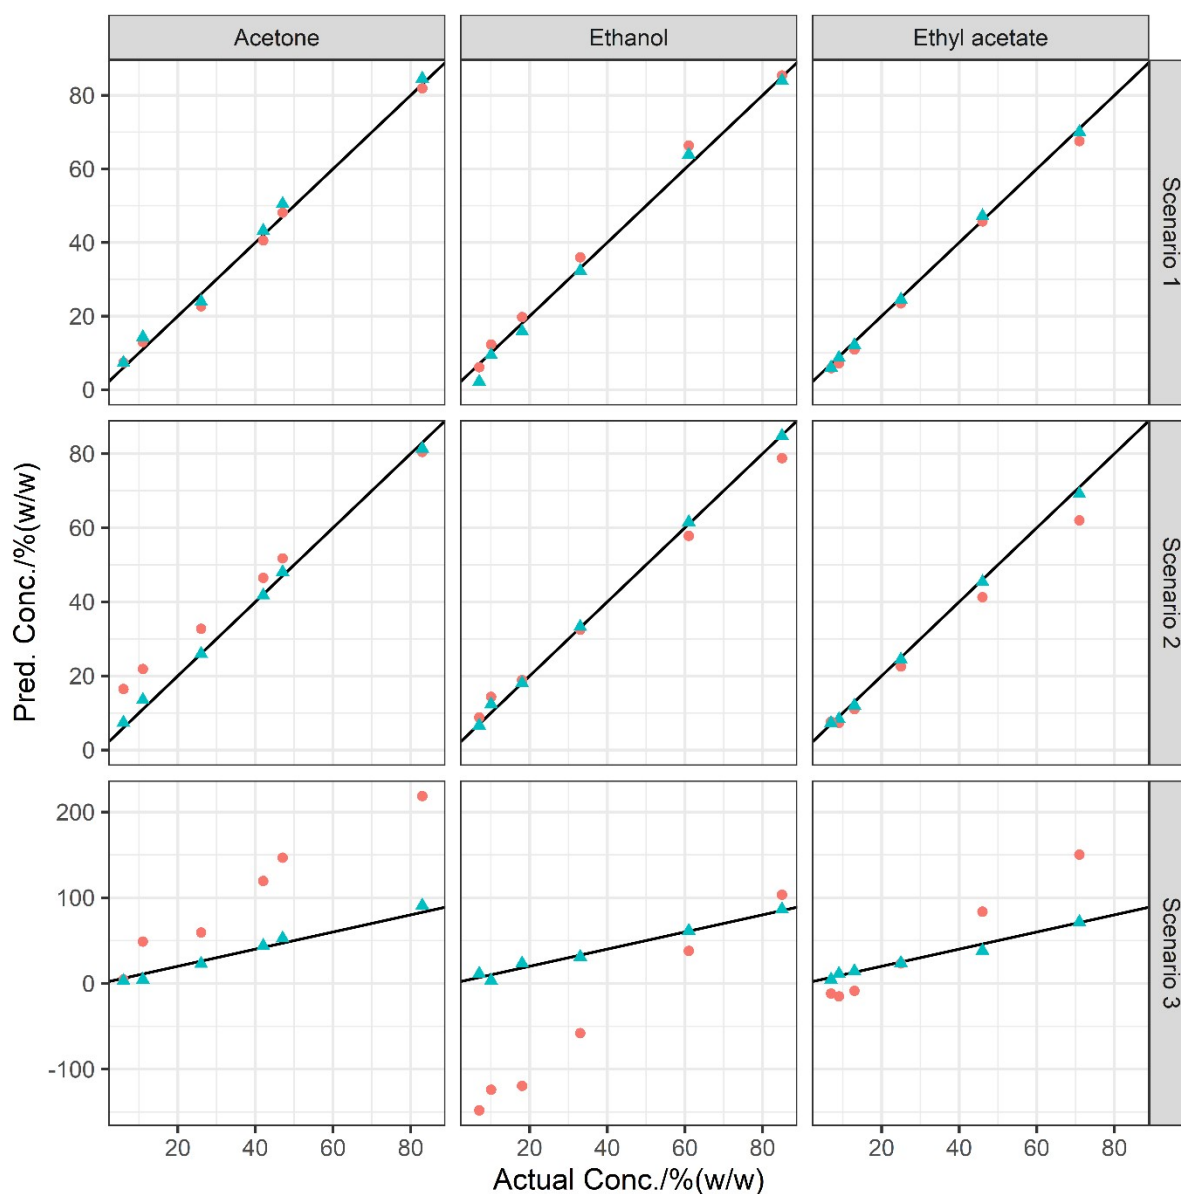

Fig. S2 Plots of actual v predicted concentration for acetone, ethanol and ethyl acetate for calibration models constructed on a primary system and used to predict the composition of test samples acquired on a secondary system without standardisation (red circles) and in conjunction with SST standardisation (teal triangles). Samples 1, 2, 3 and 7 were used for standardisation. The solid line denotes  $y = x$ . The spectrometer upgrade scenario 1 used the spectrometer-probe combinations 6 (primary) and 5 (secondary), the multiplexed probes scenario 2 used 7 (primary) and 6 (secondary), and the different diameter probes scenario 3 used 4 (primary) and 5 (secondary).

Table S2. RMSEP values (% w/w) for acetone, ethanol, and ethyl acetate when the calibration and test spectra were acquired using the spectrometer upgrade scenario, with and without use of DS, PDS, SST, and SST with scaling and using different subsets of standardisation samples. The primary system was the FTLA2000 spectrometer and probe 1 (spectrometer-probe combination 6), and the secondary system was the MB3000 spectrometer and probe 1 (spectrometer-probe combination 5).

| Analyte       | Standardisation samples | Primary test samples | Secondary test samples |     |                                           |                                           |                                            |     |                  |
|---------------|-------------------------|----------------------|------------------------|-----|-------------------------------------------|-------------------------------------------|--------------------------------------------|-----|------------------|
|               |                         |                      | No standardisation     | DS  | PDS [window size] optimised with sample 8 | PDS [window size] optimised with sample 9 | PDS [window size] optimised with sample 10 | SST | SST with scaling |
| Acetone       | 1, 2, 3, 7              | 1.7                  | 1.9                    | 2.2 | 2.1 [69]                                  | 1.7 [1]                                   | 2.3 [41]                                   | 2.3 | 2.3              |
|               | 4, 5, 6, 7              |                      |                        | 2.2 | 2.8 [53]                                  | 2.9 [47]                                  | 2.1 [1]                                    | 3.1 | 3.2              |
|               | 7, 8, 9, 10             |                      |                        | 2.6 | 3.2 [5] <sup>a</sup>                      | 3.3 [7] <sup>b</sup>                      | 3.3 [7] <sup>c</sup>                       | 2.7 | 2.7              |
|               | 2, 4, 5, 7              |                      |                        | 5.4 | 2.7 [3]                                   | 2.9 [33]                                  | 2.7 [7]                                    | 2.7 | 2.6              |
|               | 1, 4, 6, 7              |                      |                        | 5.7 | 3.6 [1]                                   | 6.5 [35]                                  | 3.6 [1]                                    | 5.1 | 5.0              |
|               | 3, 5, 6, 7              |                      |                        | 5.9 | 2.1 [17]                                  | 1.9 [1]                                   | 2.1 [35]                                   | 4.5 | 4.5              |
| Ethanol       | 1, 2, 3, 7              | 1.0                  | 2.8                    | 2.4 | 2.0 [3]                                   | 2.0 [3]                                   | 2.6 [7]                                    | 2.5 | 2.5              |
|               | 4, 5, 6, 7              |                      |                        | 1.9 | 2.0 [47]                                  | 2.0 [49]                                  | 2.7 [23]                                   | 2.2 | 2.2              |
|               | 7, 8, 9, 10             |                      |                        | 2.3 | 2.8 [5] <sup>a</sup>                      | 2.6 [3] <sup>b</sup>                      | 2.6 [3] <sup>c</sup>                       | 2.5 | 2.5              |
|               | 2, 4, 5, 7              |                      |                        | 3.7 | 2.4 [47]                                  | 2.4 [43]                                  | 2.7 [21]                                   | 2.4 | 2.3              |
|               | 1, 4, 6, 7              |                      |                        | 2.4 | 4.3 [15]                                  | 5.1 [23]                                  | 3.6 [101]                                  | 3.8 | 3.8              |
|               | 3, 5, 6, 7              |                      |                        | 6.2 | 2.0 [31]                                  | 2.0 [1]                                   | 2.2 [7]                                    | 4.0 | 3.9              |
| Ethyl acetate | 1, 2, 3, 7              | 1.5                  | 2.0                    | 0.9 | 0.9 [51]                                  | 0.6 [5]                                   | 0.9 [81]                                   | 0.8 | 0.8              |
|               | 4, 5, 6, 7              |                      |                        | 1.9 | 1.9 [51]                                  | 1.3 [11]                                  | 0.9 [1]                                    | 1.6 | 1.6              |
|               | 7, 8, 9, 10             |                      |                        | 1.8 | 1.4 [1] <sup>a</sup>                      | 1.4 [1] <sup>b</sup>                      | 1.4 [1] <sup>c</sup>                       | 1.7 | 1.7              |
|               | 2, 4, 5, 7              |                      |                        | 2.5 | 1.5 [17]                                  | 1.2 [5]                                   | 1.1 [7]                                    | 1.1 | 1.1              |
|               | 1, 4, 6, 7              |                      |                        | 4.2 | 2.9 [67]                                  | 1.5 [37]                                  | 1.1 [35]                                   | 1.5 | 1.4              |
|               | 3, 5, 6, 7              |                      |                        | 1.6 | 1.3 [5]                                   | 0.8 [31]                                  | 1.2 [35]                                   | 1.5 | 1.5              |

<sup>a</sup> PDS window size was optimised with sample 1

<sup>b</sup> PDS window size was optimised with sample 2

<sup>c</sup> PDS window size was optimised with sample 3

Table S3. RMSEP values (% w/w) for acetone, ethanol and ethyl acetate when the calibration and test spectra were acquired using the multiplexed probes scenario, with and without use of DS, PDS, SST, and SST with scaling and using different subsets of standardisation samples. The primary system was the FTLA2000 spectrometer and probe 2 (spectrometer-probe combination 7), and the secondary system was the FTLA2000 spectrometer and probe 1 (spectrometer-probe combination 6).

| Analyte       | Standardisation samples | Primary test samples | Secondary test samples |     |                                             |                                             |                                              |     |                  |
|---------------|-------------------------|----------------------|------------------------|-----|---------------------------------------------|---------------------------------------------|----------------------------------------------|-----|------------------|
|               |                         |                      | No standardisation     | DS  | PDS [window size] (optimised with sample 8) | PDS [window size] (optimised with sample 9) | PDS [window size] (optimised with sample 10) | SST | SST with scaling |
| Acetone       | 1, 2, 3, 7              | 1.0                  | 7.3                    | 1.4 | 1.5 [3]                                     | 1.5 [43]                                    | 1.3 [101]                                    | 1.4 | 1.4              |
|               | 4, 5, 6, 7              |                      |                        | 3.9 | 2.7 [5]                                     | 2.3 [3]                                     | 1.9 [1]                                      | 2.4 | 2.2              |
|               | 7, 8, 9, 10             |                      |                        | 2.1 | 1.1 [7] <sup>a</sup>                        | 1.3 [3] <sup>b</sup>                        | 1.1 [21] <sup>c</sup>                        | 1.9 | 1.8              |
|               | 2, 4, 5, 7              |                      |                        | 3.7 | 2.2 [7]                                     | 1.6 [51]                                    | 1.4 [33]                                     | 1.8 | 1.7              |
|               | 1, 4, 6, 7              |                      |                        | 3.6 | 1.9 [1]                                     | 3.7 [95]                                    | 2.2 [31]                                     | 1.9 | 1.8              |
|               | 3, 5, 6, 7              |                      |                        | 2.1 | 1.9 [1]                                     | 1.9 [3]                                     | 2.2 [101]                                    | 2.0 | 2.1              |
| Ethanol       | 1, 2, 3, 7              | 1.2                  | 3.5                    | 1.0 | 0.8 [1]                                     | 0.9 [3]                                     | 0.8 [1]                                      | 1.0 | 1.0              |
|               | 4, 5, 6, 7              |                      |                        | 1.7 | 0.9 [11]                                    | 1.0 [1]                                     | 2.0 [65]                                     | 1.3 | 1.3              |
|               | 7, 8, 9, 10             |                      |                        | 0.9 | 0.8 [15] <sup>a</sup>                       | 0.8 [13] <sup>b</sup>                       | 1.1 [5] <sup>c</sup>                         | 0.8 | 0.8              |
|               | 2, 4, 5, 7              |                      |                        | 1.8 | 1.5 [7]                                     | 0.9 [93]                                    | 1.5 [7]                                      | 1.1 | 1.0              |
|               | 1, 4, 6, 7              |                      |                        | 2.5 | 1.1 [1]                                     | 1.6 [3]                                     | 1.1 [1]                                      | 1.4 | 1.3              |
|               | 3, 5, 6, 7              |                      |                        | 2.4 | 1.1 [9]                                     | 1.4 [47]                                    | 1.1 [1]                                      | 1.3 | 1.3              |
| Ethyl acetate | 1, 2, 3, 7              | 0.4                  | 4.4                    | 1.6 | 1.1 [3]                                     | 1.0 [7]                                     | 1.1 [3]                                      | 1.0 | 1.0              |
|               | 4, 5, 6, 7              |                      |                        | 3.0 | 2.6 [11]                                    | 2.3 [71]                                    | 1.7 [1]                                      | 1.7 | 1.6              |
|               | 7, 8, 9, 10             |                      |                        | 1.4 | 0.9 [19] <sup>a</sup>                       | 1.2 [1] <sup>b</sup>                        | 0.9 [21] <sup>c</sup>                        | 1.0 | 1.0              |
|               | 2, 4, 5, 7              |                      |                        | 3.9 | 1.8 [7]                                     | 1.5 [33]                                    | 1.8 [1]                                      | 1.8 | 1.7              |
|               | 1, 4, 6, 7              |                      |                        | 4.0 | 3.1 [69]                                    | 3.1 [83]                                    | 1.3 [31]                                     | 1.4 | 1.2              |
|               | 3, 5, 6, 7              |                      |                        | 2.3 | 1.7 [1]                                     | 1.7 [55]                                    | 1.7 [1]                                      | 1.4 | 1.3              |

<sup>a</sup> PDS window size was optimised with sample 1

<sup>b</sup> PDS window size was optimised with sample 2

<sup>c</sup> PDS window size was optimised with sample 3

Table S4. RMSEP values (% w/w) for acetone, ethanol and ethyl acetate when the calibration and test spectra were acquired using the different probe diameter scenario (2.7 to 12 mm), with and without use of DS, PDS, SST, and SST with scaling and using different subsets of standardisation samples. The primary system was the MB3000 spectrometer and probe 3 (spectrometer-probe combination 4), and the secondary system was the MB3000 spectrometer and probe 1 (spectrometer-probe combination 5).

| Analyte       | Standardisation samples | Primary test samples | Secondary test samples |     |                                             |                                             |                                              |      |                  |
|---------------|-------------------------|----------------------|------------------------|-----|---------------------------------------------|---------------------------------------------|----------------------------------------------|------|------------------|
|               |                         |                      | No standardisation     | DS  | PDS [window size] (optimised with sample 8) | PDS [window size] (optimised with sample 9) | PDS [window size] (optimised with sample 10) | SST  | SST with scaling |
| Acetone       | 1, 2, 3, 7              | 3.7                  | 78.4                   | 3.0 | 3.0 [5]                                     | 3.1 [3]                                     | 3.1 [3]                                      | 5.2  | 3.0              |
|               | 4, 5, 6, 7              |                      |                        | 6.2 | 3.2 [5]                                     | 2.9 [3]                                     | 6.0 [91]                                     | 9.7  | 8.4              |
|               | 7, 8, 9, 10             |                      |                        | 6.8 | 2.2 [1] <sup>a</sup>                        | 1.9 [3] <sup>b</sup>                        | 2.2 [1] <sup>c</sup>                         | 5.8  | 5.5              |
|               | 2, 4, 5, 7              |                      |                        | 3.3 | 5.6 [1]                                     | 2.3 [45]                                    | 3.6 [81]                                     | 14.1 | 6.3              |
|               | 1, 4, 6, 7              |                      |                        | 6.8 | 4.4 [83]                                    | 3.9 [1]                                     | 5.9 [7]                                      | 14.1 | 10.7             |
|               | 3, 5, 6, 7              |                      |                        | 8.0 | 3.7 [11]                                    | 4.5 [33]                                    | 4.7 [5]                                      | 15.0 | 12.2             |
| Ethanol       | 1, 2, 3, 7              | 2.9                  | 108.1                  | 3.0 | 3.5 [5]                                     | 3.0 [1]                                     | 3.5 [5]                                      | 4.0  | 2.6              |
|               | 4, 5, 6, 7              |                      |                        | 6.2 | 3.1 [1]                                     | 4.8 [3]                                     | 3.1 [1]                                      | 10.0 | 7.3              |
|               | 7, 8, 9, 10             |                      |                        | 5.2 | 2.1 [3] <sup>a</sup>                        | 2.1 [5] <sup>b</sup>                        | 2.0 [1] <sup>c</sup>                         | 3.0  | 3.4              |
|               | 2, 4, 5, 7              |                      |                        | 3.1 | 4.3 [1]                                     | 2.8 [71]                                    | 4.3 [1]                                      | 10.0 | 4.8              |
|               | 1, 4, 6, 7              |                      |                        | 8.0 | 4.4 [1]                                     | 5.8 [101]                                   | 4.8 [55]                                     | 10.3 | 7.4              |
|               | 3, 5, 6, 7              |                      |                        | 5.7 | 5.9 [1]                                     | 5.5 [101]                                   | 5.9 [1]                                      | 13.2 | 8.6              |
| Ethyl acetate | 1, 2, 3, 7              | 0.9                  | 39.0                   | 1.3 | 1.1 [35]                                    | 1.3 [21]                                    | 1.6 [79]                                     | 3.6  | 1.0              |
|               | 4, 5, 6, 7              |                      |                        | 2.0 | 1.9 [65]                                    | 2.3 [29]                                    | 2.4 [27]                                     | 6.0  | 2.7              |
|               | 7, 8, 9, 10             |                      |                        | 1.8 | 2.2 [101] <sup>a</sup>                      | 1.8 [45] <sup>b</sup>                       | 2.0 [41] <sup>c</sup>                        | 3.0  | 1.6              |
|               | 2, 4, 5, 7              |                      |                        | 3.6 | 1.2 [35]                                    | 0.5 [23]                                    | 2.9 [47]                                     | 7.7  | 2.1              |
|               | 1, 4, 6, 7              |                      |                        | 2.8 | 1.1 [1]                                     | 1.5 [35]                                    | 1.8 [37]                                     | 12.6 | 5.4              |
|               | 3, 5, 6, 7              |                      |                        | 2.8 | 3.9 [35]                                    | 1.5 [53]                                    | 2.5 [81]                                     | 4.6  | 2.9              |

<sup>a</sup> PDS window size was optimised with sample 1

<sup>b</sup> PDS window size was optimised with sample 2

<sup>c</sup> PDS window size was optimised with sample 3
